# Supplementary material for: DCMEX coordinated aircraft and ground observations: Microphysics, aerosol and dynamics during cumulonimbus development
Source: Copernicus journal article supplement (doi:10.5194/essd-2023-303), 2023-08-31
Supplement: Supplementary file 1 [file essd-2023-303-supplement.pdf]

**Supplementary table 1**

Below are noted the known issues with the FAAM aircraft instrument operation during the campaign

| Instrument             | Operation notes                                                                                                                                                                         |
|------------------------|-----------------------------------------------------------------------------------------------------------------------------------------------------------------------------------------|
| AIMMS                  | May have iced up for approx 10 min on 22nd July 18:20:30                                                                                                                                |
| CIP100                 | Significant image noise on the 23rd and 24th July                                                                                                                                       |
| PCASP                  | On the 16th July, 10Hz resulted in numerous communications dropouts that are flagged in data. 5Hz measurement from 19th can still lead to occasional dropouts and concentration spikes. |
| non-deiced temperature | There were times when this probe suffered from icing should be automatically flagged in the data.                                                                                       |
| CPC                    | There were some data losses on the 20th and 23rd July, and 1st August                                                                                                                   |

| Supplementary table 2 |               | Key                                           | operational           | Partially operational / more analysis required | Not operational |                                                                    |                                                                   |                                                                   |                                                                   |                                                                   |                                                                   |                                                                    |                             |
|-----------------------|---------------|-----------------------------------------------|-----------------------|------------------------------------------------|-----------------|--------------------------------------------------------------------|-------------------------------------------------------------------|-------------------------------------------------------------------|-------------------------------------------------------------------|-------------------------------------------------------------------|-------------------------------------------------------------------|--------------------------------------------------------------------|-----------------------------|
|                       |               | Manchester cloud physics aircraft instruments |                       |                                                |                 |                                                                    | Manchester aerosol aircraft instruments                           |                                                                   |                                                                   |                                                                   |                                                                   |                                                                    | Leeds aircraft              |
| Date                  | Flight number | 2DS                                           | 3VCPI                 | HVPS-3                                         | HALOHOLO        | BCP-D (Operated by FAAM)                                           | AMS                                                               | LAAP-TOF                                                          | SP-2                                                              | GRIMM (CVI)                                                       | CPC (CVI)                                                         | UHSAS (CVI)                                                        | INP filters                 |
| 16/07/2022            | C297          |                                               |                       |                                                |                 | Full analysis required to see if any useful data can be retrieved. | pump overheated                                                   | vacuum pressure issue                                             |                                                                   |                                                                   |                                                                   | Full analysis required to see if any useful data can be retrieved. |                             |
| 19/07/2022            | C298          |                                               |                       |                                                |                 |                                                                    | operational error                                                 | vacuum pressure issue                                             |                                                                   |                                                                   |                                                                   |                                                                    | Only PTFE filters collected |
| 20/07/2022            | C299          |                                               |                       |                                                |                 |                                                                    |                                                                   | laser alignment issue                                             |                                                                   | incomplete data                                                   | incomplete data                                                   |                                                                    | Only PTFE filters collected |
| 22/07/2022            | C300          |                                               |                       |                                                |                 |                                                                    |                                                                   |                                                                   |                                                                   |                                                                   |                                                                   |                                                                    |                             |
| 23/07/2022            | C301          |                                               | 2DS Image Noise       |                                                |                 |                                                                    |                                                                   | From now, available data in both aerosol mode and cloud residuals |                                                                   | From now, available data in both aerosol mode and cloud residuals | From now, available data in both aerosol mode and cloud residuals | From now, available data in both aerosol mode and cloud residuals  |                             |
| 24/07/2022            | C302          |                                               |                       |                                                |                 |                                                                    |                                                                   |                                                                   |                                                                   | incomplete data                                                   | incomplete data                                                   |                                                                    |                             |
| 25/07/2022            | C303          |                                               |                       |                                                |                 |                                                                    |                                                                   |                                                                   |                                                                   |                                                                   |                                                                   |                                                                    |                             |
| 26/07/2022            | C304          |                                               |                       |                                                |                 |                                                                    | pump overheated                                                   | From now, Excimer laser safety issue                              |                                                                   |                                                                   |                                                                   |                                                                    |                             |
| 27/07/2022            | C305          |                                               |                       |                                                |                 |                                                                    |                                                                   |                                                                   | From now, available data in both aerosol mode and cloud residuals |                                                                   |                                                                   |                                                                    |                             |
| 29/07/2022            | C306          |                                               |                       |                                                |                 |                                                                    |                                                                   |                                                                   |                                                                   |                                                                   |                                                                   |                                                                    |                             |
| 30/07/2022            | C307          |                                               |                       |                                                |                 |                                                                    | From now, available data in both aerosol mode and cloud residuals |                                                                   |                                                                   |                                                                   |                                                                   |                                                                    |                             |
| 31/07/2022            | C308          | Rack power supply issue                       | Low CPI laser voltage |                                                |                 |                                                                    |                                                                   |                                                                   |                                                                   | Rack power supply issue                                           |                                                                   |                                                                    |                             |
| 01/08/2022            | C309          |                                               |                       |                                                |                 |                                                                    |                                                                   |                                                                   |                                                                   |                                                                   |                                                                   |                                                                    |                             |
| 02/08/2022            | C310          |                                               |                       |                                                |                 |                                                                    |                                                                   |                                                                   |                                                                   |                                                                   |                                                                   |                                                                    |                             |
| 03/08/2022            | C311          |                                               |                       |                                                |                 |                                                                    | Time of flight Power Supply issue                                 |                                                                   |                                                                   |                                                                   |                                                                   |                                                                    |                             |
| 04/08/2022            | C312          |                                               |                       |                                                |                 |                                                                    | Time of flight Power Supply issue                                 |                                                                   |                                                                   |                                                                   |                                                                   |                                                                    |                             |
| 06/08/2022            | C313          |                                               |                       |                                                |                 |                                                                    |                                                                   |                                                                   |                                                                   |                                                                   |                                                                   |                                                                    |                             |
| 07/08/2022            | C314          |                                               |                       |                                                |                 |                                                                    |                                                                   |                                                                   |                                                                   |                                                                   |                                                                   |                                                                    |                             |
| 08/08/2022            | C315          |                                               |                       |                                                |                 |                                                                    | Turbo pump issue                                                  |                                                                   |                                                                   |                                                                   |                                                                   |                                                                    |                             |

| Supplementary table 3 |               | Key            | operational     | Partially operational / more analysis required | Not operational               |                            |                   |                     |                           |                                                       |                             |          |
|-----------------------|---------------|----------------|-----------------|------------------------------------------------|-------------------------------|----------------------------|-------------------|---------------------|---------------------------|-------------------------------------------------------|-----------------------------|----------|
| Date                  | Flight number | Oklahoma radar |                 | NMT langmuir                                   |                               | Manchester Main laboratory | Manchester Kiva 2 | Manchester Langmuir | Aerosol PLAIR Rapid-Eplus | Leeds langmuir                                        | Leeds Socorro and Magdalena |          |
|                       |               | PX1000         | SR1             | E-field mill                                   | LEFA                          | Weather Station            | Weather Station   | Aerosol PSD GRIMM   | Aerosol PLAIR Rapid-Eplus | Digitel                                               | Camera 1                    | Camera 2 |
| 15/07/2022            | no flight     |                |                 |                                                |                               |                            | from 03:41        | Installed           |                           |                                                       | testing                     | testing  |
| 16/07/2022            | C297          |                | 16:25-18:50     |                                                |                               |                            |                   |                     | Installed                 |                                                       |                             |          |
| 17/07/2022            | no flight     |                |                 |                                                |                               |                            |                   |                     |                           | Installed and sampling                                |                             |          |
| 18/07/2022            | no flight     |                |                 |                                                |                               | from 21:53                 |                   |                     | Maintenance               |                                                       | testing                     | testing  |
| 19/07/2022            | C298          |                | 15:40-17:23     | distant lightning 22:03-23:59                  | distant lightning 22:03-23:59 |                            |                   |                     |                           |                                                       |                             |          |
| 20/07/2022            | C299          |                |                 |                                                |                               |                            |                   |                     |                           |                                                       |                             |          |
| 21/07/2022            | no flight     |                |                 | T-storm 02:44-04:00                            |                               |                            |                   |                     |                           |                                                       |                             |          |
| 22/07/2022            | C300          |                |                 |                                                |                               |                            |                   |                     |                           |                                                       | Images from 19Z only        |          |
| 23/07/2022            | C301          | 16:20-22:32    |                 | T-storm 18:31-20:00                            | T-storm 19:21-20:21           |                            |                   |                     |                           | Filter stack changeover                               |                             |          |
| 24/07/2022            | C302          | 15:51-20:14    |                 | T-storm 05:30-07:30                            |                               |                            |                   |                     |                           |                                                       |                             |          |
| 25/07/2022            | C303          | 15:48-21:05    |                 | T-storm 17:45-18:30                            | T-storm 17:58-19:00           |                            |                   |                     |                           |                                                       |                             |          |
| 26/07/2022            | C304          | 16:00-19:59    |                 | T-storm 19:42-20:30                            | T-storm 19:50-20:50           |                            |                   |                     |                           |                                                       |                             |          |
| 27/07/2022            | C305          | 16:00-20:15    |                 | T-storm 16:45-20:00                            | T-storm 17:44-18:44           |                            |                   |                     |                           |                                                       |                             |          |
| 28/07/2022            | no flight     |                |                 | T-storm 17:40-21:30                            | T-storm 19:50-23:50           |                            |                   |                     |                           | Filter stack changeover - pump did not start up again |                             |          |
| 29/07/2022            | C306          | 15:51-20:05    | 16:00-19:15     | A couple flashes 19:40-19:50                   |                               |                            |                   |                     |                           |                                                       |                             |          |
| 30/07/2022            | C307          | 15:53-20:17    | 16:55-20:13     | T-storm 17:12-20:00                            | Tstorm 17:34-21:43            |                            |                   |                     |                           |                                                       |                             |          |
| 31/07/2022            | C308          | 16:07-20:07    | 17:50-18:55     | T-storm 18:34-23:00                            | T-storm 18:44-23:59           |                            |                   |                     |                           |                                                       |                             |          |
| 01/08/2022            | C309          | 15:59-20:26    | 17:00-20:08     |                                                |                               |                            |                   |                     |                           |                                                       |                             |          |
| 02/08/2022            | C310          | 15:54-20:22    | 19:02-20:08     |                                                | data 21:00-23:00              |                            |                   |                     |                           |                                                       |                             |          |
| 03/08/2022            | C311          | 15:56-17:59    | 20:54-21:03     | T-storm 21:44-22:00                            | T-storm 21:47-22:46           |                            |                   |                     |                           |                                                       |                             |          |
| 04/08/2022            | C312          | 16:36-23:01    |                 |                                                |                               |                            |                   |                     |                           |                                                       |                             |          |
| 05/08/2022            | no flight     |                | Troubleshooting |                                                |                               |                            |                   |                     |                           | Filter stack changeover                               |                             |          |
| 06/08/2022            | C313          | 16:04-20:13    | 18:20-19:28     | T-storm 18:34-19:00                            | Data 19:04-20:04              |                            |                   |                     |                           |                                                       |                             |          |
| 07/08/2022            | C314          | 16:57-23:23    | 17:10-20:13     | T-storm 18:12-19:38                            | T-storm 18:41-20:41           |                            |                   |                     | Maintenance               |                                                       |                             |          |
| 08/08/2022            | C315          | 16:32-19:27    | 16:55-18:53     |                                                | Data 22:37-23:59              |                            |                   |                     |                           |                                                       |                             |          |
